# Supplementary material
Source: publisher figshare collection journal article supplement (https://tandf.figshare.com/articles/dataset/_/16604505)
Supplement: Supplementary file 1 [file 1]

**Supplemental material**

**Table 3**  Results of generalized estimation equation (GEE) analyses for AFO conditions, with shank to vertical angle at midstance as independent variable.

|  |  |  |  | **95 % confidence interval** | |  |  | |  | |
| --- | --- | --- | --- | --- | --- | --- | --- | --- | --- | --- |
| **Parameter** | **Intercept** | **B** | **Std Error** | **Upper bound** | **Lower bound** | **Wald χ2** | | **p** | |
| **Knee Angle IC** | -1.6 | 1.64 | 0.25 | 1.14 | 2.13 | 42.27 | **<0.01*** | | |
| **Knee Angle MST** | 4.8 | 0.89 | 0.17 | 0.55 | 1.23 | 26.81 | **<0.01*** | | |
| **Knee Angle TST** | -4.2 | 0.85 | 0.22 | 0.43 | 1.28 | 15.45 | **<0.01*** | | |
|  |  |  |  |  |  |  |  | | |
| **Knee Moment IC** | -0.2 | 0.01 | 0.00 | 0.01 | 0.02 | 9.03 | **<0.01*** | | |
| **Knee Moment MST** | -0.1 | 0.00 | 0.01 | -0.02 | 0.02 | 0.00 | 0.96 | | |
| **Knee Moment TST** | -0.6 | 0.02 | 0.01 | 0.01 | 0.04 | 7.98 | **<0.01*** | | |
|  |  |  |  |  |  |  |  | | |
| **SVA IC** | -21.0 | 1.24 | 0.16 | 0.92 | 1.55 | 59.02 | **<0.01*** | | |
| **SVA MST** | - | - | - | - | - | - | **-** | | |
| **SVA TST** | 8.1 | 0.91 | 0.12 | 0.67 | 1.16 | 53.20 | **<0.01*** | | |

B-values represent regression coefficients (slope), resulting from GEE. *p<0.05. AFO: ankle foot orthosis. IC: initial contact, MST: midstance, TST: terminal stance.
